# Supplementary material
Source: PubMed Central journal article supplement (PMC3462072)

## SUPPLEMENTAL INFORMATION

### Normalized Diurnal and Between-Day Trends in Illicit and Legal Drugs Loads that Account for Changes in Population

Alex J. Brewer,<sup>a</sup> Christoph Ort,<sup>b,c</sup> Caleb J. Banta-Green,<sup>d</sup> Jean- Daniel Berset,<sup>e</sup> and Jennifer A. Field<sup>a\*</sup>

<sup>a</sup> Department of Environmental and Molecular Toxicology, Oregon State University, Corvallis, Oregon, USA

<sup>b</sup> Swiss Federal Institute of Aquatic Science and Technology, Dübendorf, Switzerland

<sup>c</sup> The University of Queensland, Advanced Water Management Centre, Brisbane, Australia

<sup>d</sup> Alcohol and Drug Abuse Institute, University of Washington, Seattle, Washington, USA

<sup>e</sup> Water and Soil Protection Laboratory, Office of Water and Waste, Bern, Switzerland

### EXPERIMENTAL METHODS

**Chemical Analyses.** All wastewater samples were analyzed for all substances (except creatinine) within one of two analytical sequences with sequence one containing days 1 and 3 while sequence two was comprised of samples from days 3 and 4. Samples analyzed for creatinine were run in a single run. The concentration range for standards used to construct the calibration curve for this study ranged 50,000-10,000,000 ng/L (creatinine); 2,000-200,000 ng/L (caffeine); 40-4,000 ng/L (methamphetamine); 5-500 ng/L (cocaine); and 40-4,000 ng/L (benzoylecgonine) in 5 mM ammonium acetate buffer. The lower limits of quantification for analytes were 50,000 ng/L (creatinine), 2,000 ng/L (caffeine), 40 ng/L (methamphetamine), 5 ng/L (cocaine), and 40 ng/L (BZE). In the case of creatinine and caffeine, the LOQs represent the lowest calibration standard needed to quantify the high concentrations of creatinine and caffeine and are well above instrumental detection limits for these analytes. All calibration curves had  $R^2 > 0.98$  with 1/X weighting. Analytes were assigned a concentration if the signal-to-noise (S/N) met the criteria of  $S/N \geq 10$  and was at or above the lowest calibration curve standard. For a given peak, if S/N was  $> 10$  but below the lowest calibration standard, no concentration was assigned. The lower limit of quantification was determined as the lowest calibration standard. The ratio of quantifier to qualifier ion ratios were plotted against each other with  $R^2$  values of  $> 0.89$  for all analytes. For all analytical sequences, two quality control samples (standards) were analyzed after every eight samples and were considered acceptable with a percent agreement  $\geq 70\%$ .

**Sampling Stability.** Single 500 mL grab samples of raw influent were collected on three days and immediately transported to the laboratory. Prior to analysis, cocaine and benzoylecgonine were spiked to a concentration of  $\sim 100$  ng/L, each sample was shaken before removing three 15 mL aliquots for illicit drugs and caffeine and an additional three 1.5 mL aliquots for creatinine analysis and placed in a  $-20$  °C freezer until analysis (these aliquots are time = 0). The remaining sample volume was then placed in a 4 °C refrigerator and then subsampled according to the procedure describe above at hours 1, 2, 3, 4, 5, 6, 7, 12, and 24 for a total of ten samples per day. All samples were then analyzed as described above.

**Accuracy and Precision.** A single wastewater sample was picked at random within each analytical sequence and run four multiple times for precision, as indicated by % RSD (Table S2). For determining accuracy, a custom made, third party reference standard (human urine) was prepared by UTAK Laboratories Inc. (Valencia, CA). The reference urine was diluted by a

47 factor of 1000 with 5 mM ammonium acetate buffer. The dilute solution was then spiked with  
48 internal standards for all substances and analyzed twice, once in the beginning of a sequence and  
49 again at the end (Table S4).  
50

## 51 RESULTS AND DISCUSSION

52 **Weighted Estimate of the Municipality's Urine Creatinine Concentration.** The  
53 actual population in the municipality at any given time is unknown. As indicated, the most  
54 recent census found 54,462 residents and a separate study estimated 9,000 commuters for a total  
55 potential population of 63,462 during the study period. No demographic data was available for  
56 the commuters, it was assumed that they had the same ethnic/age distribution as that of the  
57 municipality. Because no independent measure of population was available, the measured  
58 creatinine loads were used to estimate the population utilizing the WWTP during the study  
59 period. The first step was to create a weighted estimate of the municipality's creatinine  
60 concentration in urine based on the municipality's demographics (e.g., ethnic and age  
61 distribution). The fraction of each ethnic group of the total population was determined (Table  
62 S2). Assuming that every ethnic group had the same age distribution, the fraction of each age  
63 group (Table S2) within each ethnic group was computed and then multiplied by the median, 10<sup>th</sup>  
64 percentile, and 90<sup>th</sup> percentile creatinine urine concentrations reported in Barr.<sup>1</sup> When an age  
65 bracket (e.g., 31-45) of the municipality spanned more than one age bracket (e.g., 30-39 and 40-  
66 49) in the published creatinine in urine dataset,<sup>1</sup> an average of the median, 10<sup>th</sup> percentile, and  
67 90<sup>th</sup> percentile creatinine concentrations for the two age groups was used. This value was then  
68 used with Equation S3 to estimate the population utilizing the WWTP on each of the four  
69 sampling days.  
70

## 71 Literature Cited

- 72  
73 (1) Barr, D. B.; Wilder, L. C.; Caudill, S. P.; Gonzalez, A. J.; Needham, L. L.; Pirkle, J. L.  
74 Urinary creatinine concentrations in the U.S population: implications for urinary biologic  
75 monitoring measurements. *Environ. Health Perspect.* **2005**, *113*, 192-200.  
76 (2) Population Research Center, P. S. U. Certified population estimate within city/town. In  
77 2010.  
78 (3) Murakami, K.; Sasaki, S.; Takahashi, Y.; Uenishi, K.; Watanabe, T.; Kohri, T.;  
79 Yamasaki, M.; Watanabe, R.; Baba, K.; Shibata, K.; Takahashi, T.; Hayabuchi, H.; Ohki, K.;  
80 Suzuki, J. Sensitivity and specificity of published strategies using urinary creatinine to identify  
81 incomplete 24-h urine collection. *Nutrition* **2008**, *24*, 16-22.  
82  
83  
84  
85  
86  
87  
88  
89  
90  
91  
92

93 **Table S1.** Race and age distribution for the municipality studied.<sup>2</sup>

| <b>Group</b>            | <b>Numbers of People</b> | <b>%</b> |
|-------------------------|--------------------------|----------|
| Asian                   | 4610                     | 0.07     |
| Black                   | 674                      | 0.01     |
| Hispanic                | 4709                     | 0.07     |
| American Indian         | 330                      | 0.01     |
| White                   | 50469                    | 0.80     |
| Other                   | 2424                     | 0.04     |
| <b>Age distribution</b> |                          | <b>%</b> |
|                         | Under 15                 | 0.13     |
|                         | 18 to 24                 | 0.36     |
|                         | 25 to 30                 | 0.09     |
|                         | 31 to 45                 | 0.15     |
|                         | 46 to 60                 | 0.16     |
|                         | 61 and over              | 0.15     |

94

95 **Table S2.** Intra-hour variation in wastewater flow as indicated by the percent relative standard  
 96 deviation for the four sampling days.

| <b>Hour</b> | <b>Day 1</b> | <b>Day 2</b> | <b>Day 3</b> | <b>Day 4</b> |
|-------------|--------------|--------------|--------------|--------------|
| 8 am-9 am   | 11%          | 6%           | 28%          | 10%          |
| 9am-10 am   | 11%          | 9%           | 13%          | 24%          |
| 10 am-11 am | 11%          | 7%           | 21%          | 7%           |
| 11 am-12 pm | 14%          | 20%          | 9%           | 10%          |
| 12 pm-1 pm  | 13%          | 18%          | 9%           | 11%          |
| 1 pm-2 pm   | 9%           | 10%          | 13%          | 11%          |
| 2 pm-3 pm   | 11%          | 10%          | 12%          | 12%          |
| 3pm-4pm     | 20%          | 14%          | 11%          | 11%          |
| 4 pm-5pm    | 8%           | 23%          | 12%          | 13%          |
| 5pm-6pm     | 14%          | 10%          | 8%           | 8%           |
| 6pm-7pm     | 12%          | 11%          | 10%          | 10%          |
| 7pm-8pm     | 10%          | 10%          | 12%          | 14%          |
| 8pm-9pm     | 12%          | 14%          | 10%          | 9%           |
| 9pm-10pm    | 14%          | 12%          | 12%          | 12%          |
| 10-pm-11pm  | 15%          | 11%          | 12%          | 14%          |
| 11pm-12pm   | 12%          | 11%          | 23%          | 9%           |
| 12pm-1am    | 17%          | 16%          | 17%          | 17%          |
| 1am-2am     | 18%          | 21%          | 16%          | 19%          |
| 2am-3am     | 7%           | 9%           | 27%          | 10%          |
| 3am-4am     | 17%          | 23%          | 16%          | 20%          |
| 4am-5am     | 31%          | 16%          | 22%          | 22%          |
| 5am-6am     | 11%          | 16%          | 26%          | 21%          |
| 6am-7am     | 34%          | 9%           | 15%          | 20%          |
| 7am-8am     | 5%           | 5%           | 10%          | 14%          |

97 **Table S3.** Precursor and product ion (m/z), cone (V), and collision voltages (eV).  
 98

|                    | Precursor Ion<br>(m/z) | Product Ion<br>(m/z) | Cone<br>(V) | Collision<br>(eV) |
|--------------------|------------------------|----------------------|-------------|-------------------|
| Creatinine         | 113.9                  | 43.8                 | 10          | 15                |
|                    | 113.9                  | 86.0                 | 25          | 10                |
| Creatinine D3      | 116.9                  | 46.9                 | 20          | 10                |
|                    | 116.9                  | 89.1                 | 20          | 10                |
| Caffeine           | 195.2                  | 110.2                | 30          | 25                |
|                    | 195.2                  | 138.3                | 30          | 20                |
| Caffeine D3        | 198.1                  | 140.3                | 35          | 20                |
| Methamphetamine    | 150.0                  | 91.1                 | 25          | 15                |
|                    | 150.0                  | 119.2                | 20          | 10                |
| Methamphetamine D5 | 155.1                  | 91.7                 | 20          | 20                |
| Benzoylecgonine    | 290.2                  | 105.1                | 30          | 20                |
|                    | 290.2                  | 168.4                | 20          | 20                |
| Benzoylecgonine D3 | 293.2                  | 151.0                | 30          | 25                |
|                    | 293.2                  | 171.4                | 30          | 20                |
| Cocaine            | 304.1                  | 105.1                | 35          | 25                |
|                    | 304.1                  | 182.3                | 30          | 20                |
| Cocaine D3         | 307.3                  | 185.5                | 30          | 20                |

99  
 100 **Table S4.** Precision (% RSD) of the whole method for wastewater for each sequence.  
 101

| Substance       | Sequence 1 <sup>b</sup> | Sequence 2 <sup>c</sup> |
|-----------------|-------------------------|-------------------------|
| Creatinine      |                         | 3.2%                    |
| Caffeine        | 1.2 %                   | 9.3 %                   |
| Methamphetamine | 1.3 %                   | 13 %                    |
| Benzoylecgonine | 16 %                    | 25 %                    |
| Cocaine         | 16 %                    | 19 %                    |

102 <sup>a</sup> The separate analysis for creatinine was conducted in a single sequence that included all the  
 103 samples from the four sampling days.

104 <sup>b</sup> Sequence 1 contained samples from days 1 and 3 (March 17<sup>th</sup> and 19<sup>th</sup>).

105 <sup>c</sup> Sequence 2 contained samples from days 2 and 4 (March 18<sup>th</sup> and 20<sup>th</sup>).

106  
 107  
 108  
 109  
 110  
 111  
 112

113 **Table S5.** Percent agreement between the average measured (n=2) and certified UTAK values.

| Substance        | Certified UTAK          | % Agreement             |                         |
|------------------|-------------------------|-------------------------|-------------------------|
|                  | concentration<br>(ng/L) | Sequence 1 <sup>b</sup> | Sequence 2 <sup>c</sup> |
| Caffeine         | 60,000                  | 77%                     | 91%                     |
| Methamphetamine  | 750                     | 84%                     | 87%                     |
| Benzoyllecgonine | 350                     | 68%                     | 76%                     |
| Cocaine          | 100                     | 70%                     | 81%                     |

114 NA = not available

115 <sup>a</sup> The separate analysis for creatinine was conducted in a single sequence that included all the  
116 samples from the four sampling days.

117 <sup>b</sup> Sequence 1 contained samples from days 1 and 3 (March 17<sup>th</sup> and 19<sup>th</sup>)

118 <sup>c</sup> Sequence 2 contained samples from days 2 and 4 (March 18<sup>th</sup> and 20<sup>th</sup>)

119  
120 **Table S6.** Estimated total uncertainty expressed as % RSD for loads and analyte to creatinine  
121 ratios (See Equations S1 and S2).

|                  | Load           | Ratio            | Load           | Ratio          |
|------------------|----------------|------------------|----------------|----------------|
|                  | (days 1 and 3) | (days 1 and 3)   | (days 2 and 4) | (days 2 and 4) |
| Creatinine       |                | 7.8 <sup>a</sup> |                |                |
| Caffeine         | 16             | 8                | 15             | 15             |
| Methamphetamine  | 16             | 17               | 21             | 21             |
| Benzoyllecgonine | 22             | 23               | 24             | 24             |
| Cocaine          | 22             | 22               | 17             | 17             |

122 <sup>a</sup> The separate analysis for creatinine was conducted in a single sequence that included all the  
123 samples from the four sampling days.

124  
125 **Table S7.** Average rate constants  $\pm$  95% confidence interval and the maximum estimated percent  
126 loss for analytes in samples stored at 4°C in the autosampler for 24 h.

| Substance        | Average first-order rate<br>constant $\pm$ 95% CI<br>(h <sup>-1</sup> ) | Estimated maximum<br>loss at 24h (%) |
|------------------|-------------------------------------------------------------------------|--------------------------------------|
| Creatinine       | -6.08E-03 $\pm$ -2.06E-3                                                | 13                                   |
| Caffeine*        | -1.18E-03 $\pm$ -1.95E-3                                                | 5                                    |
| Methamphetamine* | -2.89E-04 $\pm$ -5.42E-3                                                | 8                                    |
| Benzoyllecgonine | -1.57E-02 $\pm$ -4.90E-3                                                | 32                                   |
| Cocaine*         | -2.03E-03 $\pm$ -1.13E-2                                                | 16                                   |

128 \*Rate constant not statistically different from zero at the 95% CI.

129

130 **Table S8.** Estimated total urine volume for the municipality, the estimated population for a range  
 131 of urine volumes from the literature,<sup>b</sup> and the % of the maximum (63,000) population (residents  
 132 +commuters) as computed from Equation S3.  
 133

|           | Total Measured Mass Creatinine (kg) <sup>a</sup> | Estimated Total Volume Urine of the Municipality (L) | Population urine (L) per person per day |        |        | % of Maximum Population <sup>c</sup> |
|-----------|--------------------------------------------------|------------------------------------------------------|-----------------------------------------|--------|--------|--------------------------------------|
|           |                                                  |                                                      | 0.60 L                                  | 1.1 L  | 1.7 L  |                                      |
| Wednesday | 36                                               | 28,000                                               | 17,000                                  | 18,000 | 31,000 | 26-49%                               |
| Thursday  | 27                                               | 21,000                                               | 12,000                                  | 14,000 | 23,000 | 20-37%                               |
| Friday    | 22                                               | 17,000                                               | 10,000                                  | 11,000 | 19,000 | 16-30%                               |
| Saturday  | 19                                               | 15,000                                               | 9,000                                   | 10,000 | 16,000 | 14-30%                               |

134  
 135 <sup>a</sup> Taken from Table 1.

136 <sup>b</sup> To estimate population from Equation S3, average urine volumes  $\pm$  one standard deviation  
 137 (L/d) as reported by Murakami et al. for n=654 individuals were used.<sup>3</sup>

138 <sup>c</sup> A total population of 63,462 is estimated for weekdays and 54,462 for Saturday.<sup>2</sup>  
 139  
 140

141 **Equation S1.** Calculation of total uncertainty from analysis, sampling, and flow.

$$\text{Total uncertainty} = \sqrt{(\text{RSD analytical})^2 + (\text{RSD sampling})^2 + (\text{RSD flow})^2}$$

144  
 145 **Equation S2.** Calculation of total uncertainty for analytes normalized to creatinine from analyses  
 146 of analytes (A) and creatinine (Creat) and the sampling error for each analyte and creatinine.  
 147

$$\text{Total uncertainty} = \sqrt{(\text{RSD analytical}_A)^2 + (\text{RSD sampling}_A)^2 + (\text{RSD analytical}_{Creat})^2 + (\text{RSD sampling}_{Creat})^2}$$

148  
 149 **Equation S3.** Calculation to estimate total volume of urine for the municipality and the  
 150 corresponding estimated number of people (population). The concentration of creatinine in urine  
 151 (1,300 mg/L) was estimated from the known ethnic/age demographics of the community and the  
 152 corresponding urine creatinine concentrations as reported by Barr et al.<sup>1</sup>  
 153

$$\text{Creat}_{total}^{municipality} (kg) * \frac{10^6 mg}{kg} * \frac{L_{urine}}{1,300 mg} = L_{urine}^{municipality} * \frac{person}{L_{urine}} = \text{population}^{municipality}$$

154  
 155 **Equation S4.** Calculation of caffeine doses assuming a 100 mg dose.  
 156  
 157

$$\frac{\text{Caffeine excreted (mg)}}{\text{day}} * \frac{100 \text{ mg ingested}}{1 \text{ mg excreted}} * \frac{1 \text{ dose}}{150 \text{ mg}} = \frac{\text{dose}}{\text{day}}$$

158  
 159  
 160  
 161

162 **Equation S5.** Calculation of methamphetamine doses assuming a 100 mg dose.  
163

$$\frac{\text{Methamphetamine excreted (mg)}}{\text{day}} * \frac{100 \text{ mg ingested}}{40 \text{ mg excreted}} * \frac{1 \text{ dose}}{100 \text{ mg}} = \frac{\text{dose}}{\text{day}}$$

164  
165 **Equation S6.** Calculation of cocaine doses from mass of benzoylecgonine (BZE) assuming a  
166 100 mg dose.  
167

$$\frac{\text{BZE excreted (mg)}}{\text{day}} * \frac{1 \text{ mM cocaine}}{0.45 \text{ mM BZE excreted}} * \frac{303\text{E-}4 \text{ mg cocaine}}{1 \text{ mM cocaine}} * \frac{1\text{mM BZE}}{289\text{E-}4 \text{ mg BZE}} * \frac{\text{dose}}{100 \text{ mg}} = \frac{\text{dose}}{\text{day}}$$

168  
169 **Equation S7.** Calculation of cocaine doses assuming a 100 mg dose.  
170

$$\frac{\text{Cocaine excreted (mg)}}{\text{day}} * \frac{100 \text{ mg ingested}}{1 \text{ mg excreted}} * \frac{1 \text{ dose}}{100 \text{ mg}} = \frac{\text{dose}}{\text{day}}$$

171  
172  
173

174 **FIGURES**

175

176 **Figure S1.** Creatinine concentrations over 24 h at 4°C for three different days (A, B, and C).

177 Dashed lines represent the 95%CI about the slope.<sup>1</sup>

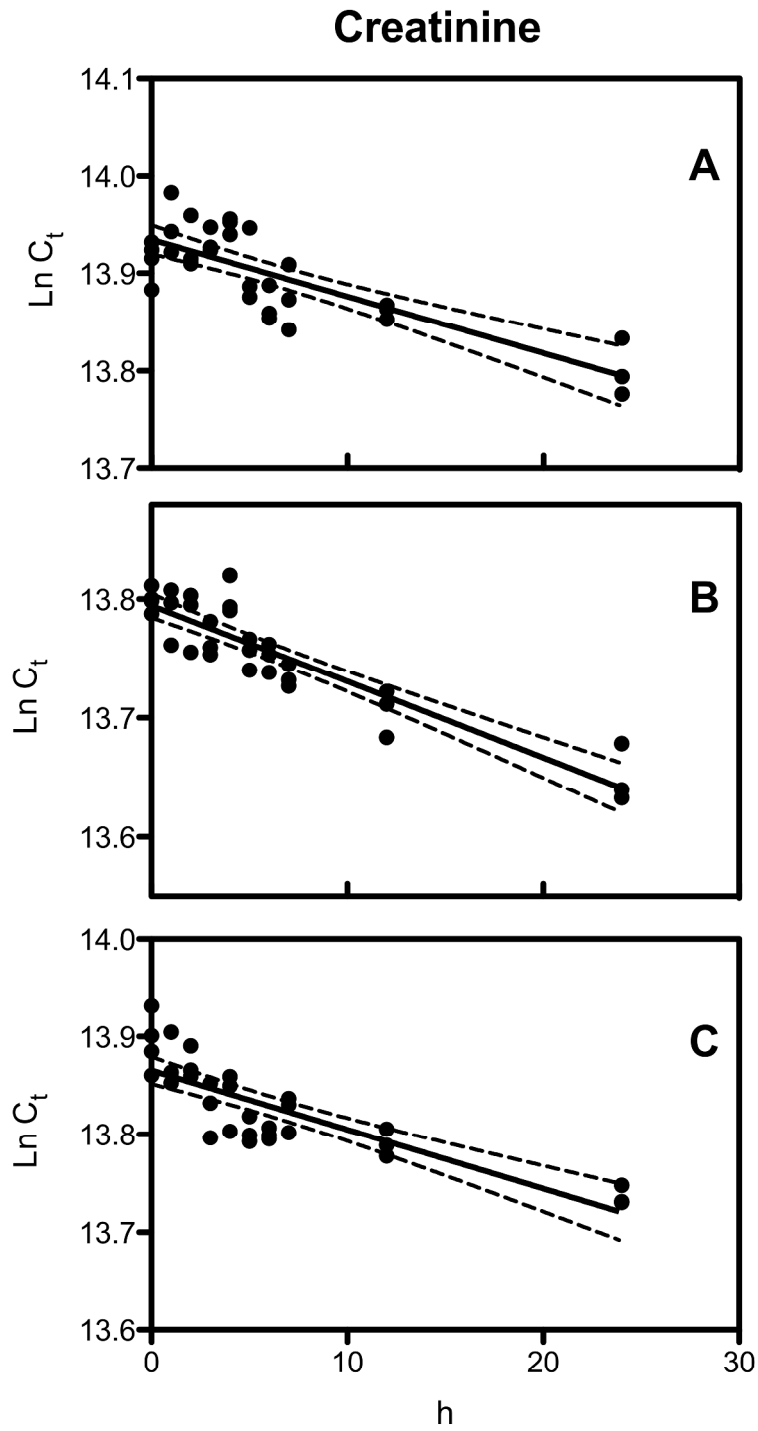

178 <sup>1</sup>n =3 at each time point except time = 0 where n=4



179  
180  
181  
182  
183

**Figure S2.** Caffeine concentrations over 24 h at 4°C for three different days (A, B, and C). Dashed lines represent the 95%CI about the slope.<sup>1</sup>

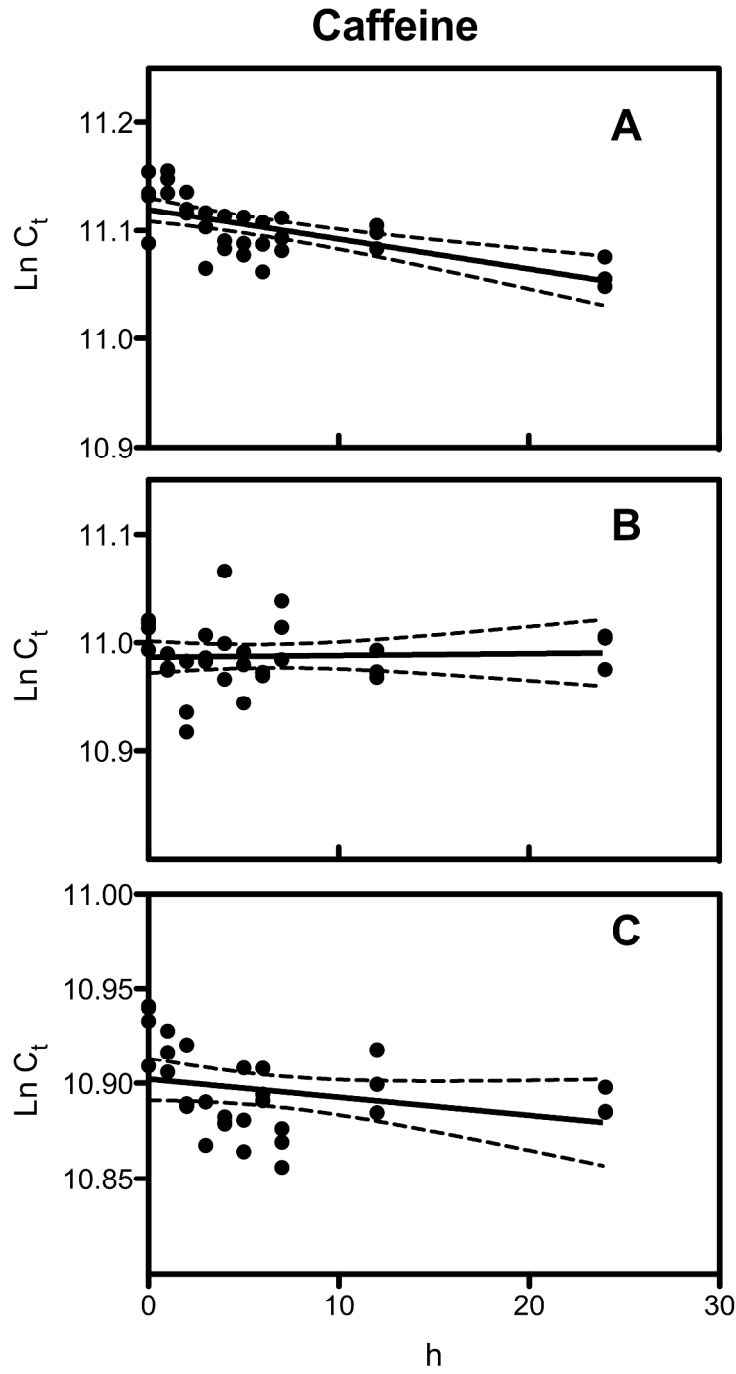

184 <sup>1</sup>n =3 at each time point except time = 0 where n=4

185  
186  
187  
188  
189

**Figure S3.** Methamphetamine concentrations over 24 h at 4°C for three different days (A, B, and C). Dashed lines represent the 95%CI about the slope.<sup>1</sup>

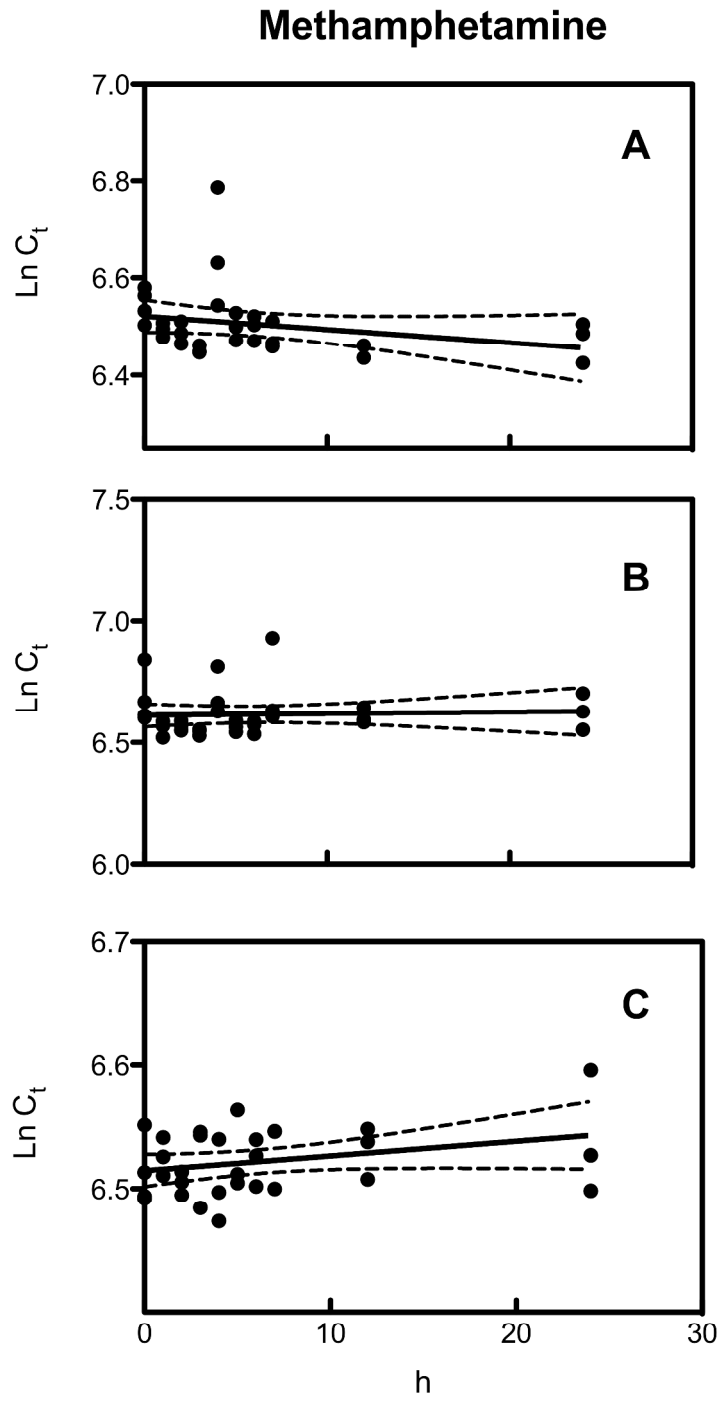

190 <sup>1</sup>n = 3 at each time point except time = 0 where n = 4

191  
192 **Figure S4.** Benzoylecgonine concentrations over 24 h at 4°C for three different days (A, B, and  
193 C). Dashed lines represent the 95%CI about the slope.<sup>1</sup>  
194

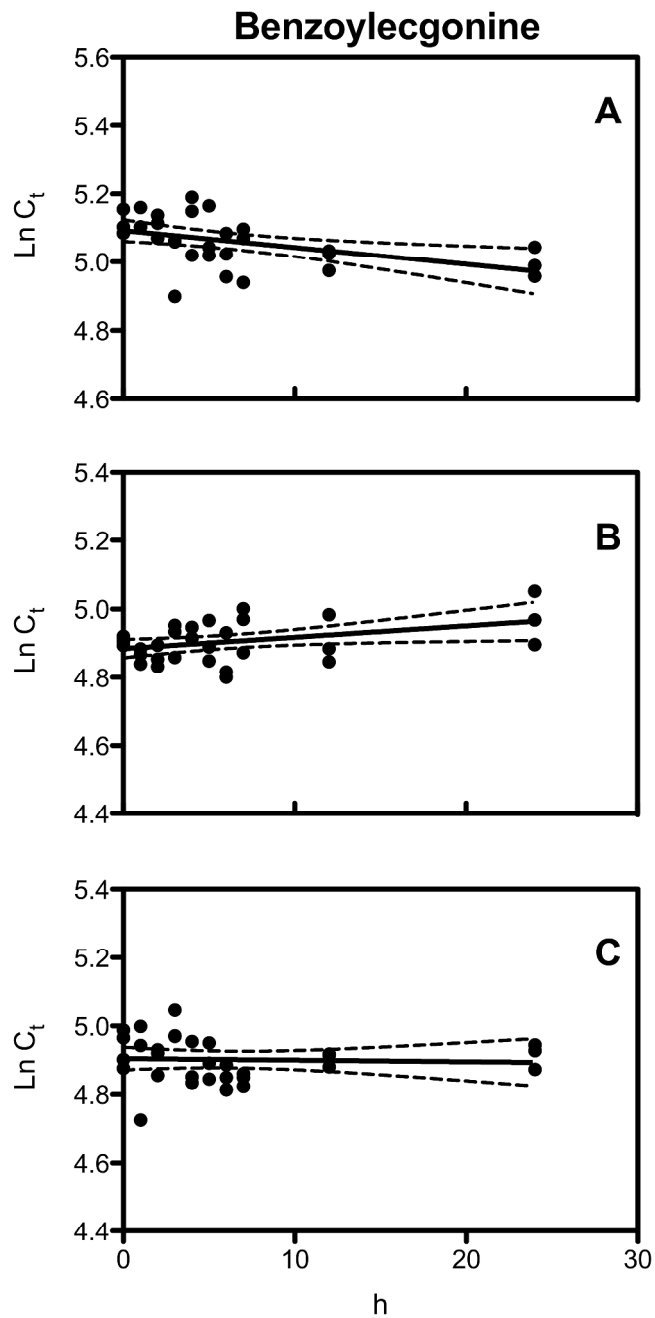

195 <sup>1</sup>n =3 at each time point except time = 0 where n=4  
196  
197  
198  
199

200 **Figure S5.** Cocaine concentrations over 24 h at 4°C for three different days (A, B, and C).  
201 Dashed lines represent the 95%CI about the slope.<sup>1</sup>  
202

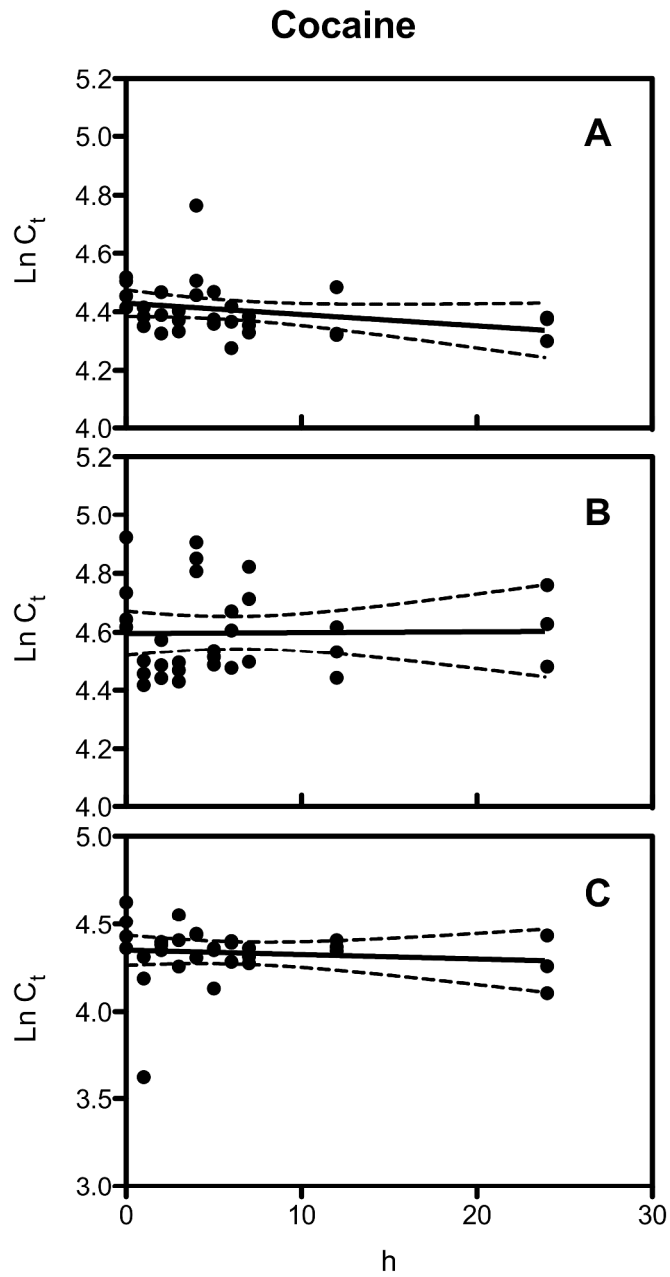

203 <sup>1</sup>n =3 at each time point except time = 0 where n=4  
204  
205  
206  
207  
208

209  
210  
211

**Figure S6.** Hourly concentrations of creatinine, caffeine, benzoylecgonine, cocaine, and methamphetamine.

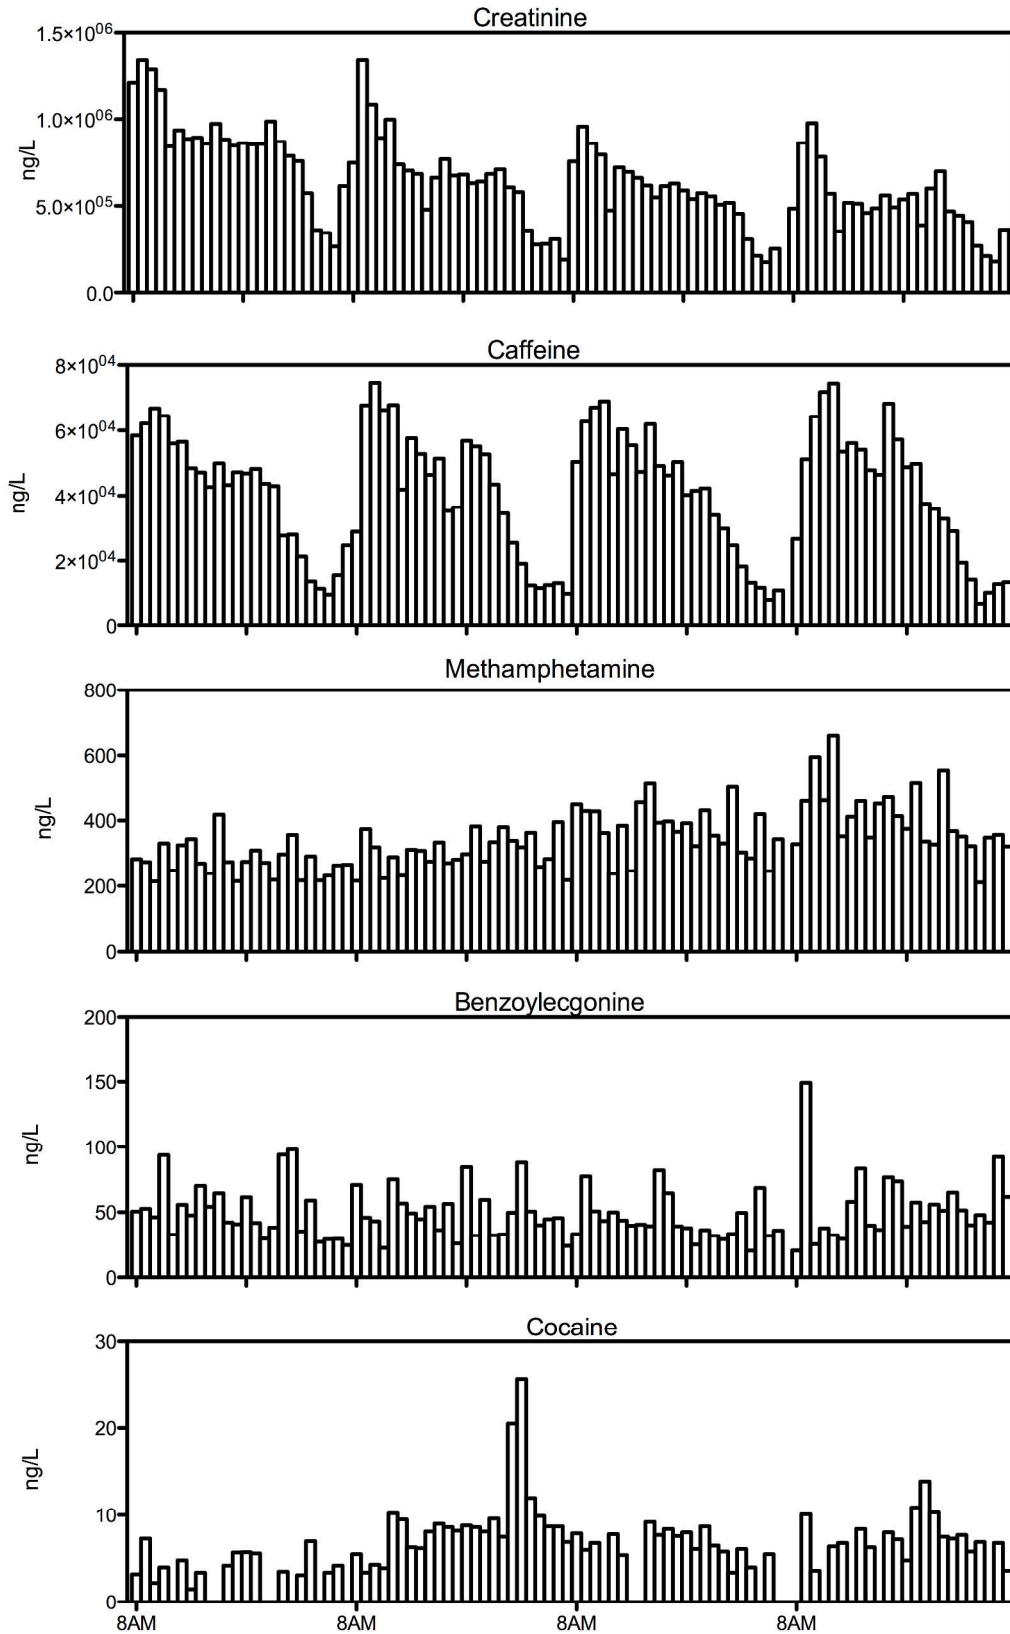

212 **Figure S7.** Ratios (mg/mg) of analytes to creatinine after applying degradation rate constant  
213 from stability study.

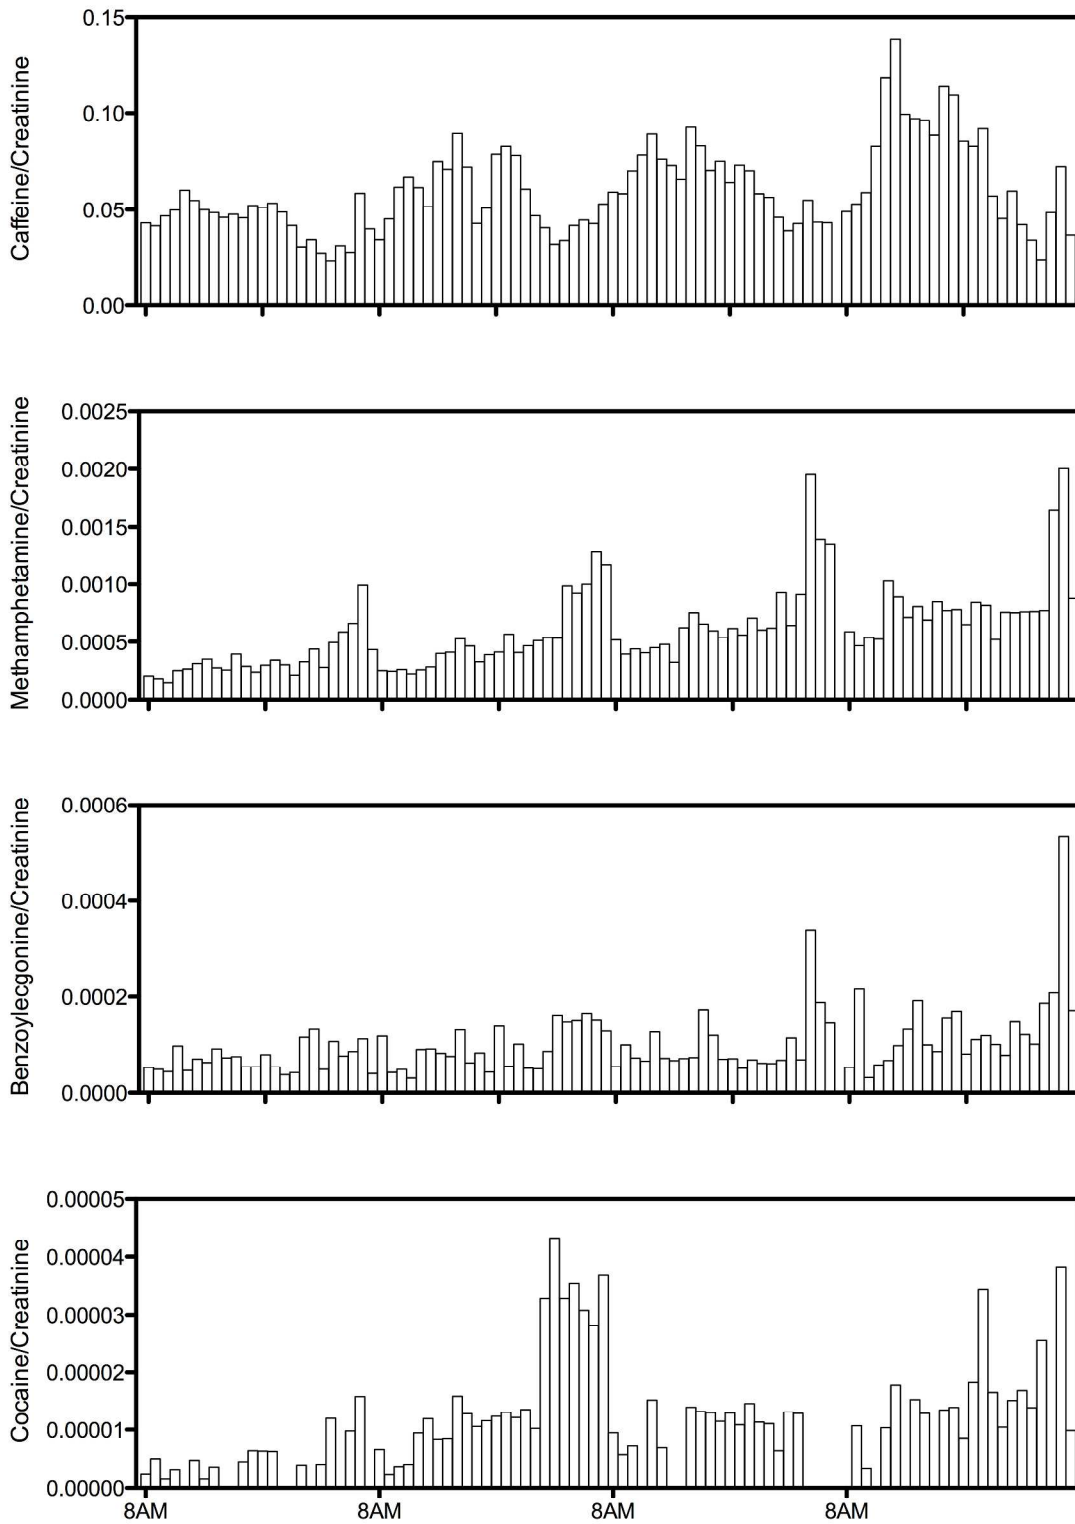

Supplement: NIHMS394745-supplement-1_si_001.pdf [file NIHMS394745-supplement-1_si_001.pdf]
